# Supplementary material for: Developmental regulation of oocyte lipid intake through ‘patent’ follicular epithelium in Drosophila melanogaster
Source: PubMed Central journal article supplement — iScience. 2021 Mar 6;24(4):102275. doi: 10.1016/j.isci.2021.102275 (PMC8005764; doi:10.1016/j.isci.2021.102275), 2021-03-06
Supplement: mmc1.pdf [file mmc1.pdf]

iScience, Volume 24

**Supplemental information**

**Developmental regulation of oocyte lipid  
intake through 'patent' follicular  
epithelium in *Drosophila melanogaster***

**Sarayu Row, Yi-Chun Huang, and Wu-Min Deng**

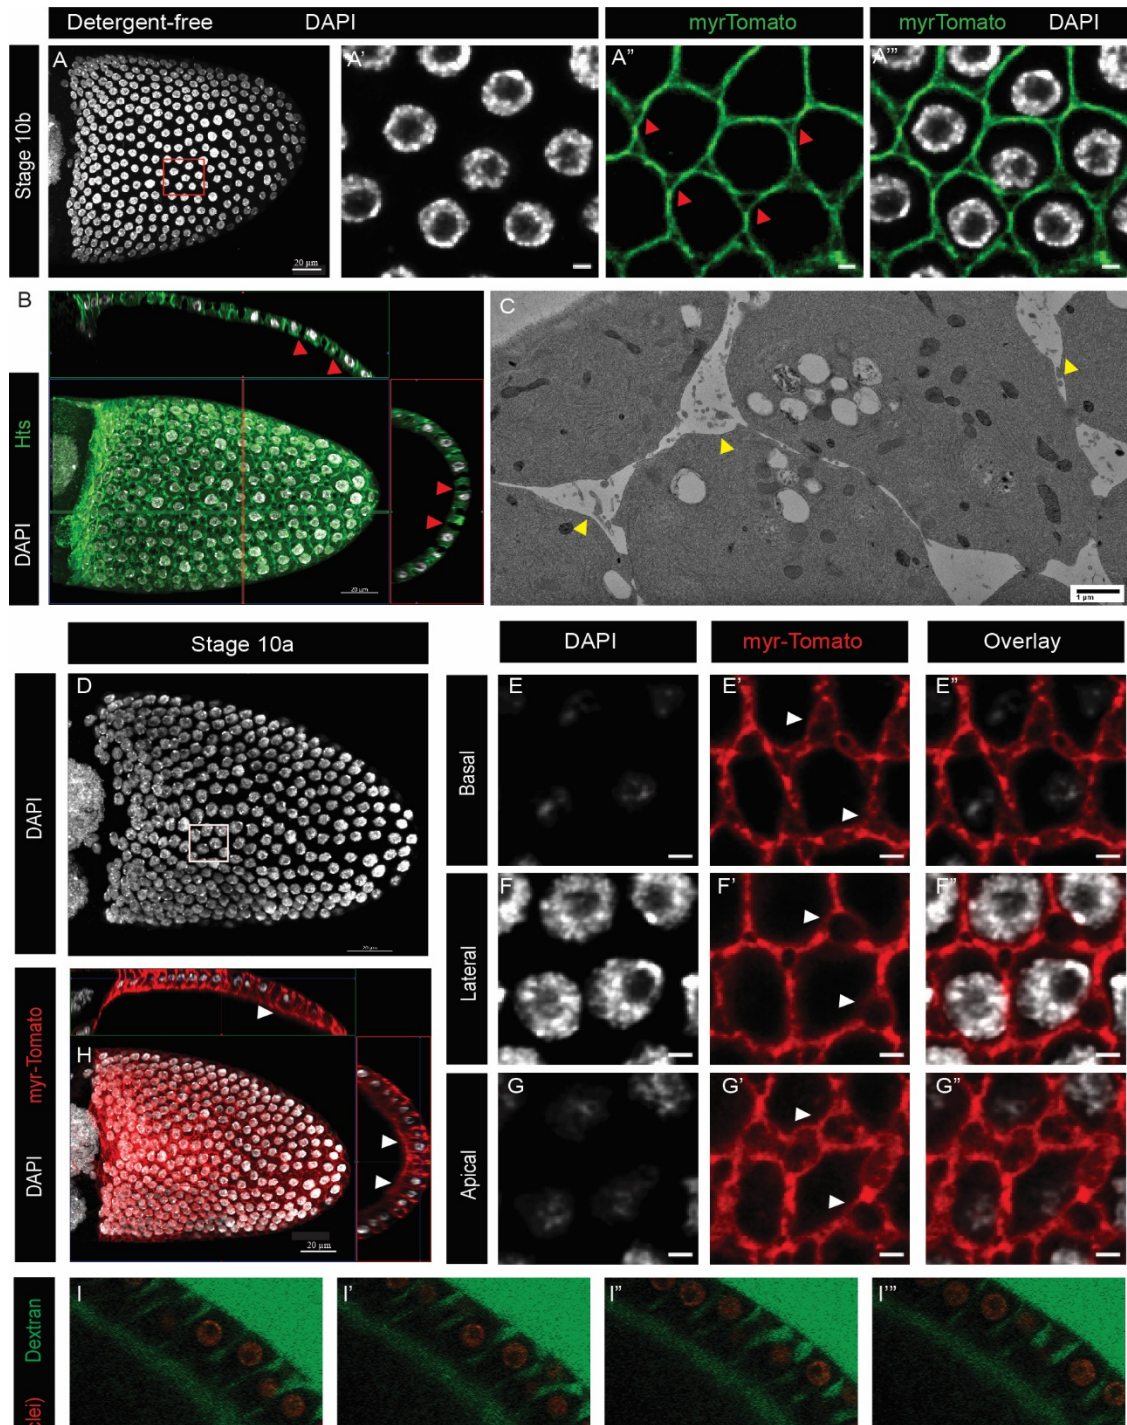

**Figure S1 Confirmation of TCJ gaps in *Drosophila* FE, relating to Figure 1** (A) Stage 10b egg chamber expressing *Tj-Gal4*, *10XUAS-myr-Td-Tomato*, fixed and mounted using a detergent-free protocol. Red box is enlarged in (A'-A''') showing patent TCs. (B) Ortho view of a projection of a St10a egg chamber with gaps across the FE (red arrowheads) His marks the membrane. (C) TEM image of a St10a egg chamber with material in the gaps (yellow arrowheads). (D-G'') Stage 10a oocyte-associated FE expressing *10XUAS-myr-Td-Tomato*. White box is expanded in (E-G''). (E-E'', F-F'', G-G'') Basal, lateral, and apical view, respectively. (H) Ortho view of a projection of a St10a *10XUAS-myr-Td-Tomato* expressing egg chamber, with gaps across the FE (white arrowheads). DAPI marks nuclei. (I-I''') Snapshots from live imaging of Stage 10a egg chamber expressing His2Av (marking nuclei), incubated in Dextran (green).

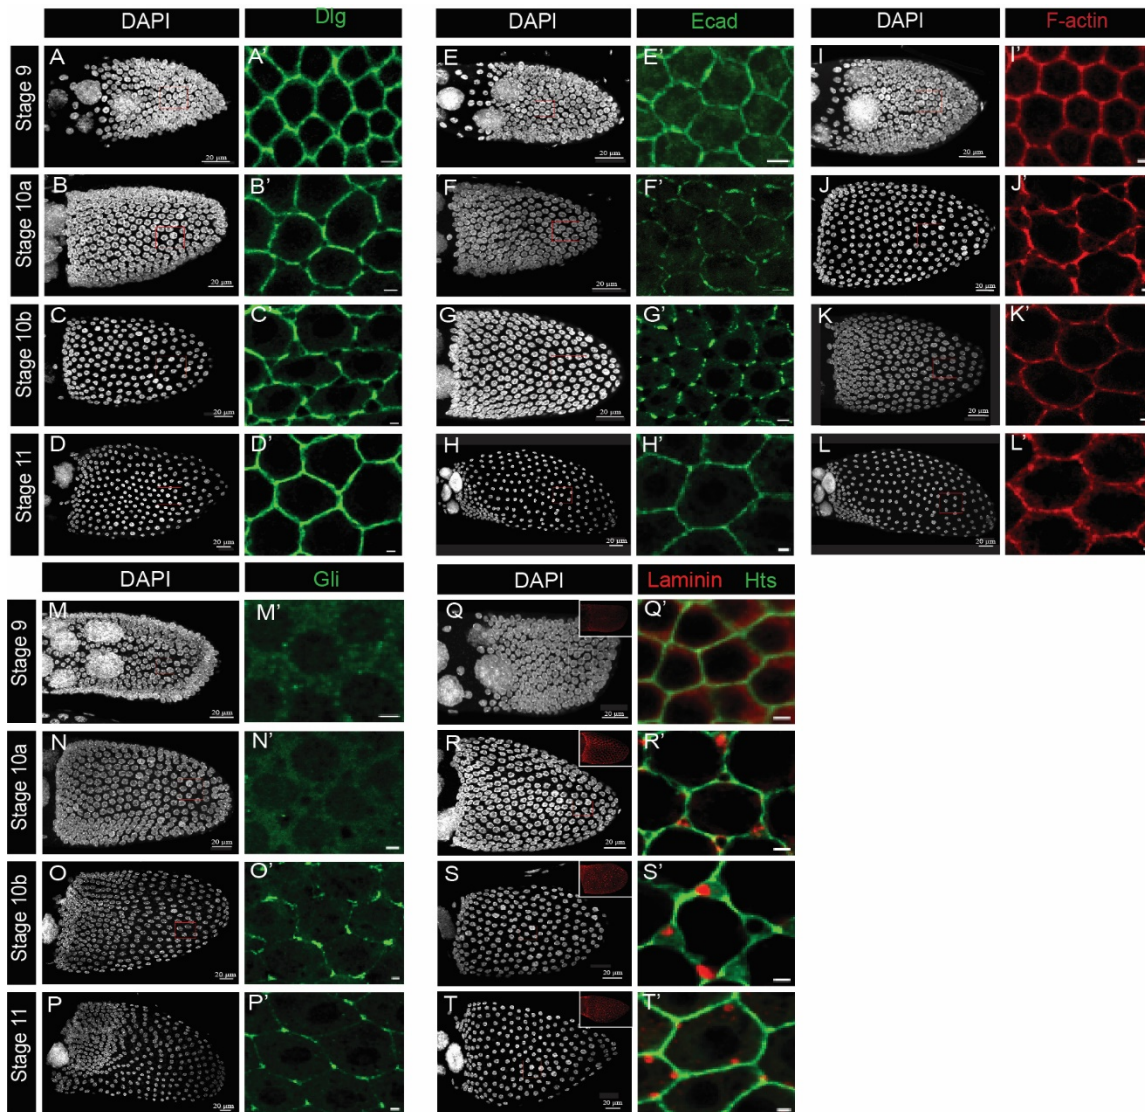

**Figure S2 Characterization of adhesion and junction proteins over patency between stage 9 and 11, relating to Figure 2** Distribution of Septate junction protein Dlg (A-D'), adherens junction protein E-cadherin (E-H'), cortical F-actin (Phalloidin) (I-L'), tricellular septate junction protein, Gliotactin (Gli) (M-P'), and basement membrane component Laminin (Q-T'). Insets in (Q-T') Laminin in the full FE.



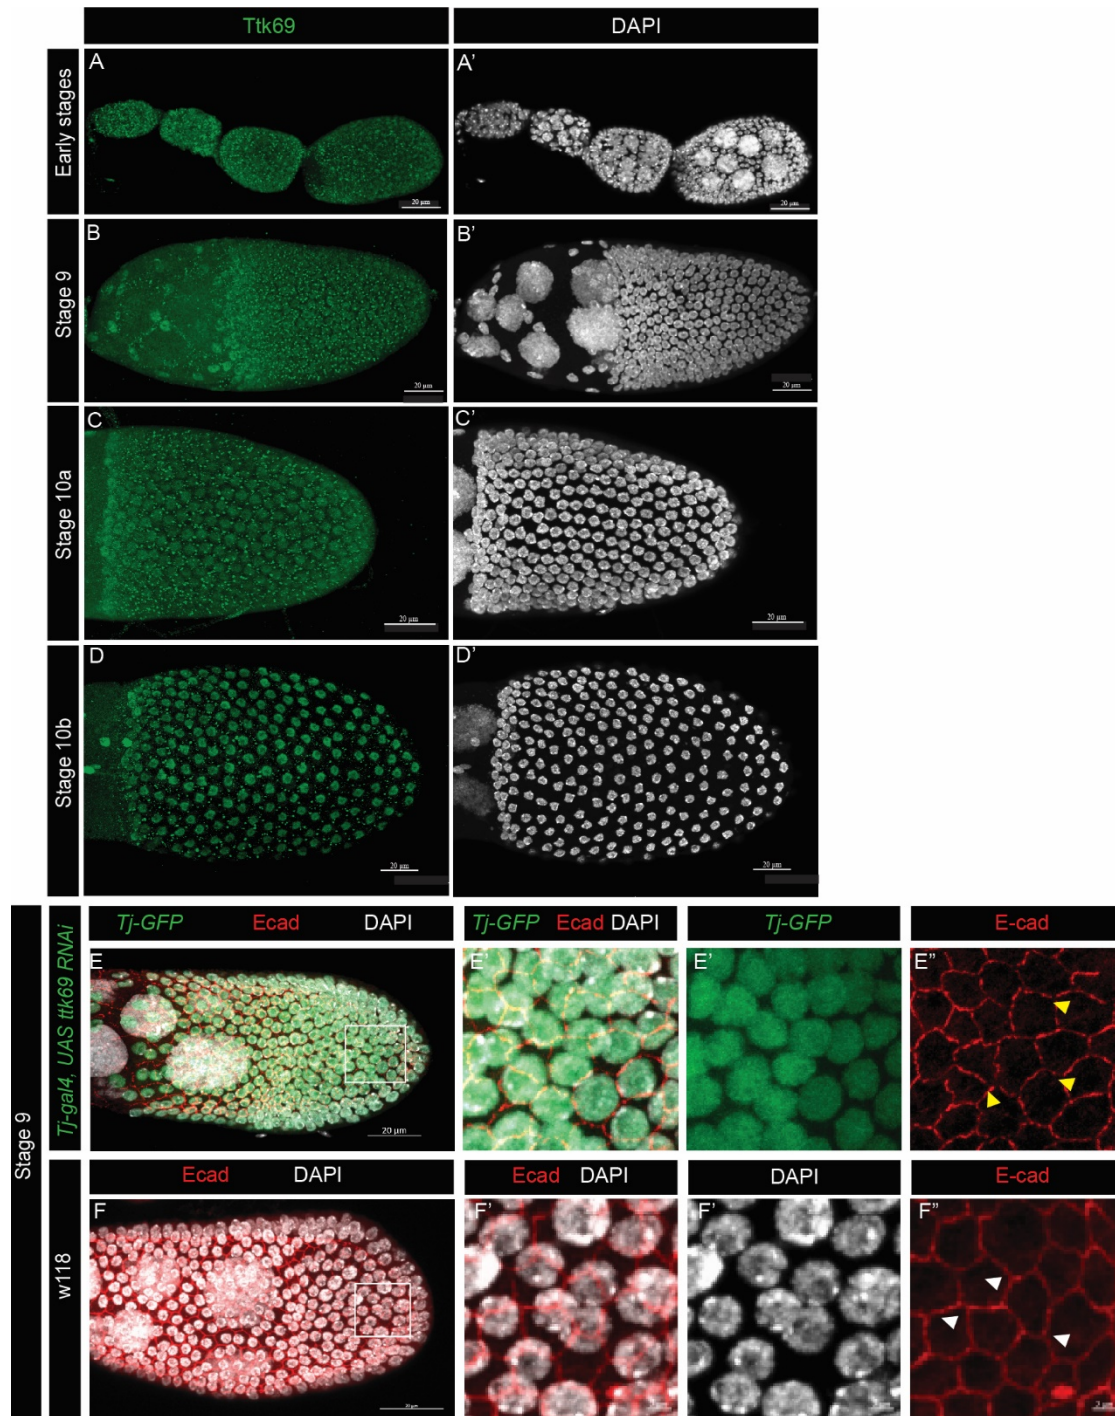

**Figure S3 Ttk69 pattern in WT FE and *UAS-ttk-RNAi* expressing FE, related to Figure 3 (A-D')**  
 Egg chambers immunostained for Ttk69 protein. Punctate signals is background noise. (E-E'') Stage 9 egg chamber expressing *UAS-ttk69-RNAi* under *Tj-Gal4*. White box is expanded in (E'-E''). E-cad is not present at TCs (yellow arrowheads). (F-F'') Stage 9 wildtype egg chamber White box is expanded in (F'-F''). E-cad present at TCs (white arrowheads). DAPI marks the nucleus.

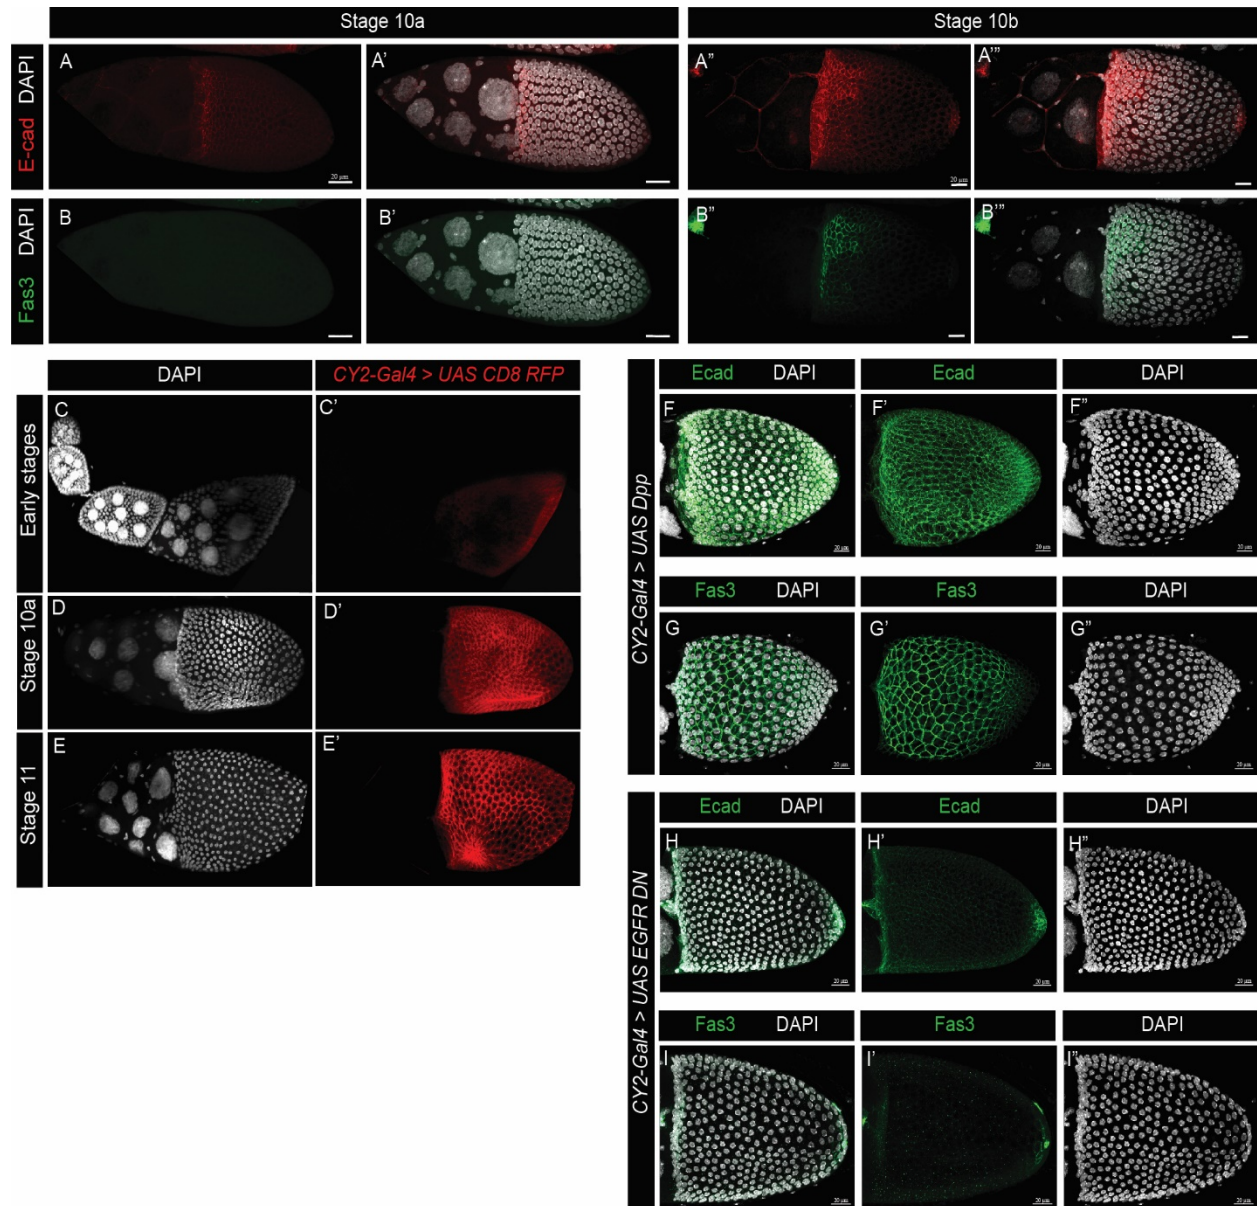

**Figure S4 Dorsal pattern of adhesion proteins E-cad and Fas3, related to Figure 4 (A-B''')** WT egg chambers with E-cad and Fas3 from St10a (A-A', B-B' respectively) to St10b (A''-A''', B''-B''', respectively). (C-E'') *CY2-Gal4* expression pattern in *Drosophila* ovaries marked by *UAS-CD8:RFP* on the membrane. (F-G'') Egg chambers expressing *UAS-Dpp* under *CY2-Gal4* driver. (H-I'') Egg chambers expressing a dominant negative form of EGFR under UAS control using the *CY2-Gal4* driver.



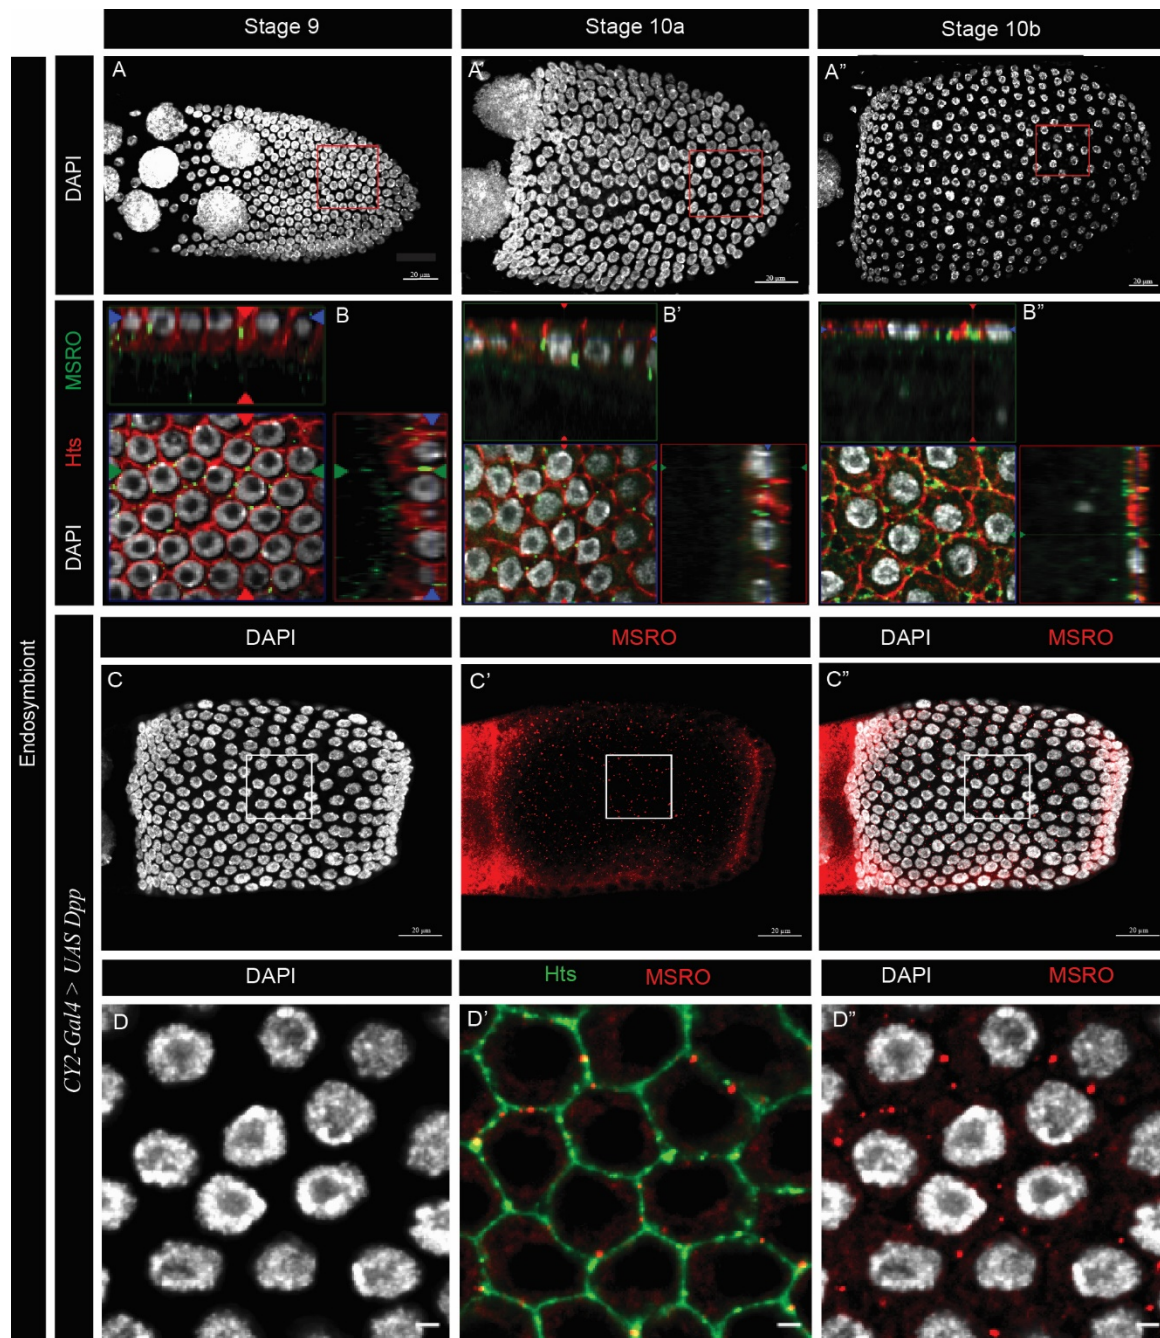

**Figure S5 Vertical transfer of the endosymbiont *Spiroplasma pulsonii*, related to Figure 5 (A-A'')**  
 Projections of DAPI stained Stage 9 – 11 egg chambers. Red boxed are enlarged in (B-B''), and ortho views are provided for top and cross-sectional views. (C-D'') MSRO staining in *UAS-Dpp* expressing FE. MSRO marks the bacteria, Hts marks the membrane, and DAPI stains the nuclei.

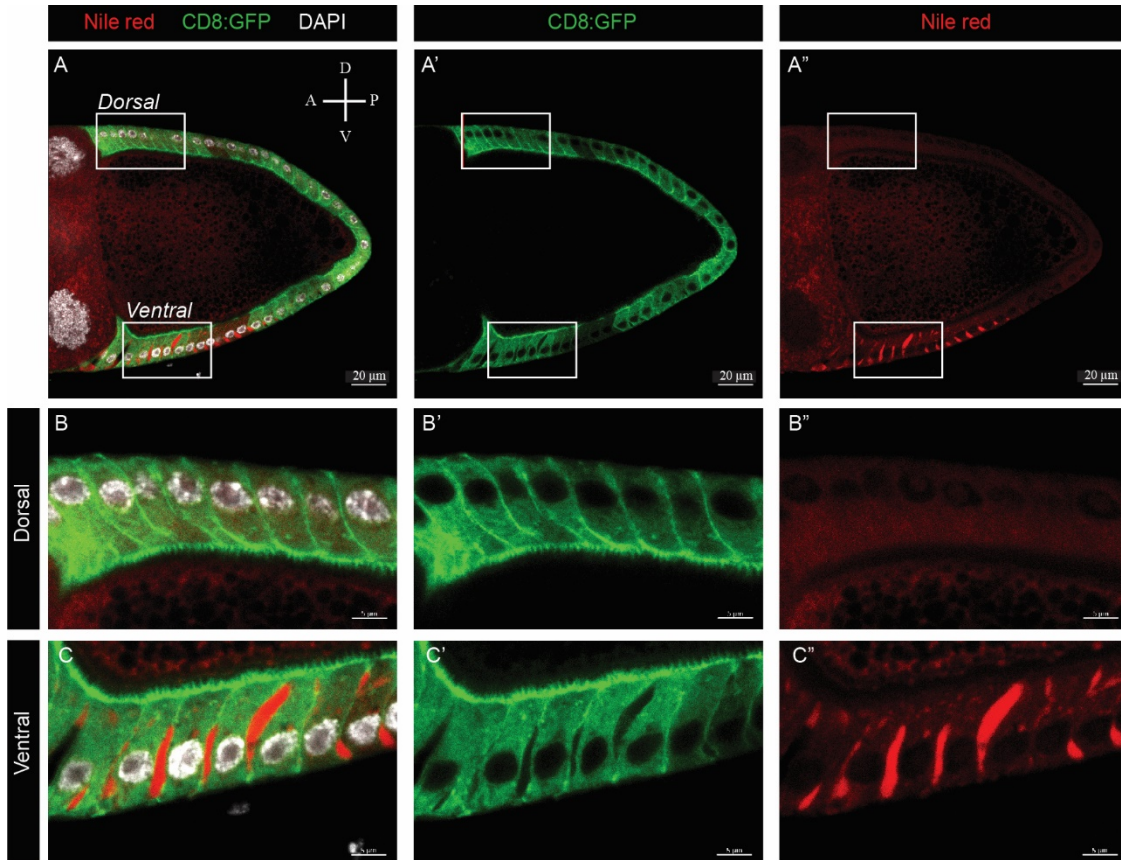

**Figure S6. Spatial pattern of trans-epithelial transport of lipids across the FE, related to Figure 5.** (A-A'') Cross section of a *UAS-CD8:GFP* expressing egg chamber. White box labelled Dorsal is expanded in (B-B''); white box labelled Ventral is expanded in (C-C'') showing TC gaps and lipids present between the cells in the patent TCs. Nile red marks lipids, DAPI marks nuclei.

## Transparent methods

### *Drosophila* strains and culture

All *Drosophila* stocks were maintained and crossed at 21–22°, unless otherwise indicated. The w<sup>118</sup> strain was used as the wild-type control. To control the temporal and regional gene expression targeting (TARGET) system, temperature-sensitive Gal80 (Gal80TS) under the ubiquitous tubulin driver was used to regulate the upstream activating sequence (UAS)-transgene expression by altering temperatures. Tj-Gal4 and CY2-Gal4 were used to drive UAS transgene expression in combination with Gal80TS. The crosses involving Gal80TS were crossed and maintained at 18°C, and progeny were kept at 29°C for 48hrs prior to dissection.

Tj-Gal4 is used to drive transgenes under UAS control in all the follicle cells across oogenesis. Transgenes that disrupt vitellogenic progression were used with CY2-Gal4, that drives transgenes under UAS control in only the oocyte associated follicle cells starting at low levels at St 9, and at high levels from St 10a [Fig. S4.(C-E')].

### Fluorescence Microscopy and Image Analysis

Ovaries were dissected, fixed, and stained with antibodies using the protocol outlined below: (Adopted from Deng *et al.*, 2001; Sun and Deng, 2005)

Ovaries were dissected in 1×PBS buffer and fixed for 10 minutes in 500µl of 4% paraformaldehyde. They were rinsed for 5 minutes with 1XPBT buffer and blocked in 20% goat serum (in PBT) for 2 hours at room temperature. The ovaries were then incubated in primary antibodies diluted in blocking buffer overnight at 4°C, followed by 4 10-minute PBT washes. They were then incubated in secondary antibodies for 2 hours at room temperature, and stained with DAPI (1µg/ml in PBT), washed three times with PBT (10 minutes each), and transferred onto slides in mounting solution (70% glycerol, 2%NPG, 1×PBS).

The following primary antibodies were used: Hu li tai shao (Hts) (1:5, 1B1), E-cadherin (Ecad) (1:20, DCAD2), Discs large (Dlg) (1:50, 4F3), and Fasciclin3 (Fas3) (1:15, 7G10) all from the Developmental Studies Hybridoma bank (DSHB), Laminin (gamma 1) (1:200, ab47651, Abcam), Gliotactin (1:50, a gift from Dr. Auld), MSRO (1:200, a gift from Dr. Lemaitre), Ttk69 (1:200, a gift from Dr. Xi). Alexa Fluor 488- or 546-conjugated goat anti-mouse and anti-rabbit secondary antibodies (1:400; Molecular Probes, Eugene, OR) were used. Phalloidin-546 (Invitrogen) was used to stain F-actin. Nuclei were labeled with DAPI (1:1000). Images were captured with Zeiss LSM 800 confocal microscope. Zeiss and ImageJ software were used for image analyses and processing.



Detergent-free protocol was modified from the standard protocol above, with all the same reagents prepared without Tween-20.

### **Lipid Staining**

Ovaries were dissected in PBS and fixed in 4% PFA for 15 minutes. Following 2 washes with PBT, the ovaries were incubated in Nile red (TCI America, 7385-67-3) (0.002% dye diluted in PBT, adopted from 29) or BODIPY 493/503 (ThermoFisher Scientific, Cat No. D3922) (Stock: 1mg/ml BODIPY in absolute ethanol, Working: 1:500 in PBS) in dark for 30 minutes. Following 2 PBT washes, the ovaries were either stained with antibodies, or with DAPI, and then mounted onto slides.

### **Live imaging**

Flies with RFP-tagged His2Av (BL 23650) were incubated in 25°C with yeast paste for 2 days. Ovaries were dissected in the Schneider Drosophila Medium (Genesee Scientific, #25-512), then st9-st11 egg chambers were mounted in 1% low-melting agarose and cultured in freshly prepared imaging medium (Schneider Drosophila Medium with 15% fly extract, 0.5% penicillin/streptomycin, and 20µg/ml insulin) on cell imaging dishes (145 µm cover glass bottom, Eppendorf #30740009). Dextran-FITC (12.5ug/ml, Sigma # 46944) was added right before imaging started. Live images were taken using a Zeiss LSM 980 Confocal Microscope with Airyscan 2, and set 1hr duration. The imaging raw data were processed and prepared by the ZEN 3.0 software.

### **Transmission Electron Microscopy**

The samples for TEM were prepared using the protocol outlined below: (adopted from Tamori et al., 2016, Matsumoto et al., 1988):

Tissue samples were fixed with Karnovsky's Fixative. After three rinses with 0.1 M sodium cacodylate buffer, samples were embedded in 3% agarose and sliced into small blocks (1mm<sup>3</sup>), rinsed with the same buffer three times and post-fixed with 1% osmium tetroxide and 0.8 % Potassium Ferricyanide in 0.1 M sodium cacodylate buffer for one and a half hours at room temperature. Samples were rinsed with water and en bloc stained with 4% uranyl acetate in 50% ethanol for two hours. They were then dehydrated with increasing concentration of ethanol, transitioned into propylene oxide, infiltrated with Embed-812 resin and polymerized in a 60°C oven overnight. Blocks were sectioned with a diamond knife (Diatome) on a Leica Ultracut 7 ultramicrotome (Leica Microsystems) and collected onto copper grids, post stained with 2% aqueous Uranyl acetate and lead citrate. Images were acquired on a JEM-1400 Plus transmission electron microscope equipped with a LaB6 source operated at 120 kV using an AMT-BioSprint 16M CCD camera.

## **Quantification and Statistical Analysis**

All quantification data was analyzed by two-tailed Student's T-test. P-values were calculated using GraphPad Prism 8. Graphs were prepared in Excel. Sample sizes and p-values where appropriate are described in the main text, figures, or figure legends.

## Supplementary references

- Auld, V. J., Fetter, R. D., Broadie, K. & Goodman, C. S. (1995) Gliotactin, a novel transmembrane protein on peripheral glia, is required to form the blood-nerve barrier in *Drosophila*. *Cell*, **81(5)**, 757-767.
- Deng, W.M., Althausen, C. & Ruohola-Baker, H. (2001) Notch-Delta signaling induces a transition from mitotic cell cycle to endocycle in *Drosophila* follicle cells. *Dev.*, **128(23)**, 4737-4746.
- Herren, J. K., Paredes, J. C., Schüpfer, F. & Lemaitre, B. (2013) Vertical Transmission of a *Drosophila* Endosymbiont Via Cooption of the Yolk Transport and Internalization Machinery. *mBio.*, **4(2)**:e00532-12. doi: 10.1128/mBio.00532-12.
- Matsumoto, E., Hirose, K., Takagawa, K. & Hotta, Y. (1988) Structure of reticular cells in a *Drosophila melanogaster* visual mutant, *rdgA*, at early stages of degeneration. *Cell Tissue Res.*, **252**, 293–300.
- Sun, J. J. & Deng, W-M. (2005) Notch-dependent downregulation of the homeodomain gene *cut* is required for the mitotic cycle/endocycle switch and cell differentiation in *Drosophila* follicle cells. *Dev.*, **132**, 4299-4308.
- Tamori, Y. T., Suzuki, E. & Deng, W-M. (2016) Epithelial tumors originate in tumor Hotspots, a tissue-intrinsic microenvironment. *PLoS Biol.*, **14(9)**, e1002537. doi:10.1371/journal.pbio.1002537.
- Wang, C., Guo, X., Dou, K., Chen, H., & Xi, R. (2015) Ttk69 acts as a master repressor of enteroendocrine cell specification in *Drosophila* intestinal stem cell lineages. *Dev.*, **142**, 3321-3331.
- Ward, E. J., Thaipisuttikul, I., Terayama, M., French, R. L., Jackson, S. M., Cosand, K. A., Tobler, K. J., Dorman, J. B. & Berg, C. A. (2002) Gal4 enhancer trap patterns during *Drosophila* development. *Genesis*, **34**, 46-50.
